# Supplementary material
Source: MDPI journal article supplement (https://www.mdpi.com/2313-0105/9/1/28)
Supplement: s1 [file s1]

# Supporting Information

## ***In-situ* solidified gel polymer electrolytes for stable solid-state lithium batteries at high temperatures**

*Junfeng Ma,<sup>1,2</sup> Zhiyan Wang,<sup>2</sup> Jinghua Wu,<sup>2</sup> Zhi Gu,<sup>2</sup> Xing Xin<sup>1</sup>, Xiayin Yao<sup>2, 3\*</sup>*

<sup>1</sup> School of Material Science and Chemical Engineering, Ningbo University, Ningbo 315211, P. R. China

<sup>2</sup> Ningbo Institute of Materials Technology and Engineering, Chinese Academy of Sciences, Ningbo 315201, P.R. China

<sup>3</sup> Center of Materials Science and Optoelectronics Engineering, University of Chinese Academy of Sciences, Beijing 100049, P.R. China

\* Corresponding author, Email: [yaoxy@nimte.ac.cn](mailto:yaoxy@nimte.ac.cn)

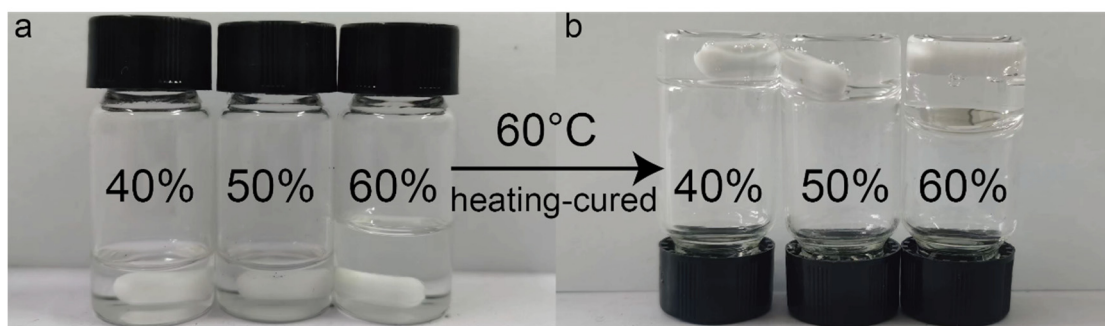

**Figure S1.** Optical images of PEGMEA, LiTFSI and initiator with varied amounts of LCE before (a) and after (b) the polymerization process.

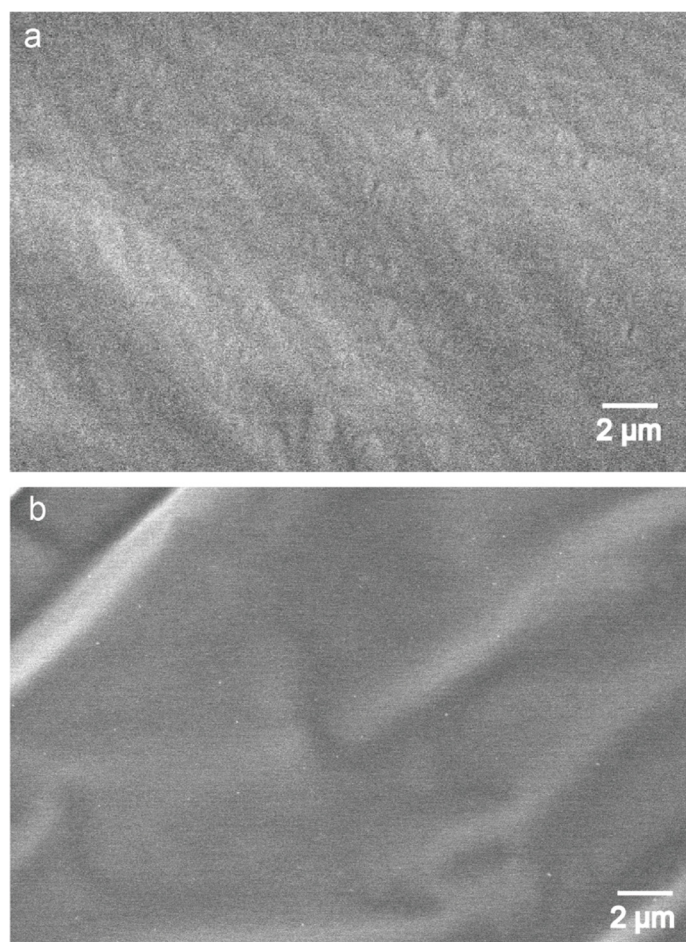

**Figure S2.** SEM images of (a) PE-40%LCE@PEG and (b) PE-60%LCE@PEG gel polymer electrolytes.

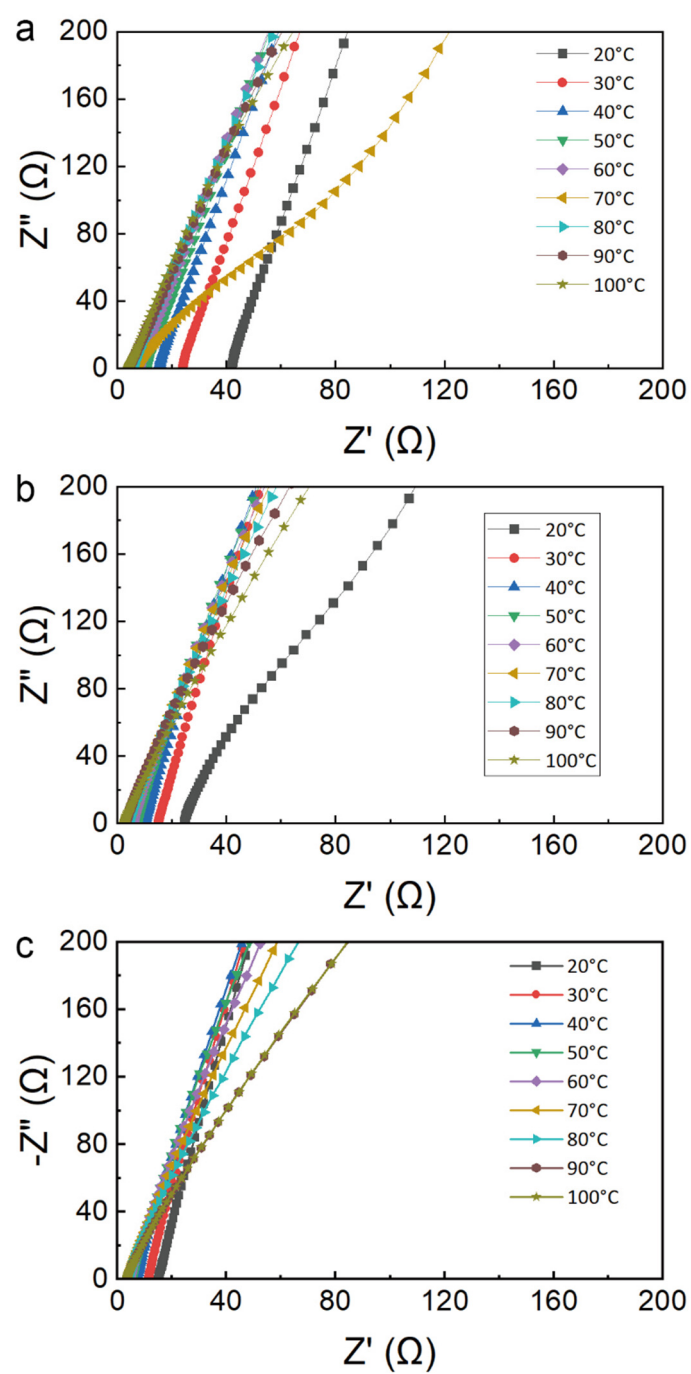

**Figure S3.** EIS plots of PE- $x\%$ LCE@PEG ( $x =$  (a) 40, (b) 50, and (c) 60) gel polymer electrolytes at different temperatures (20 ~ 100 °C).

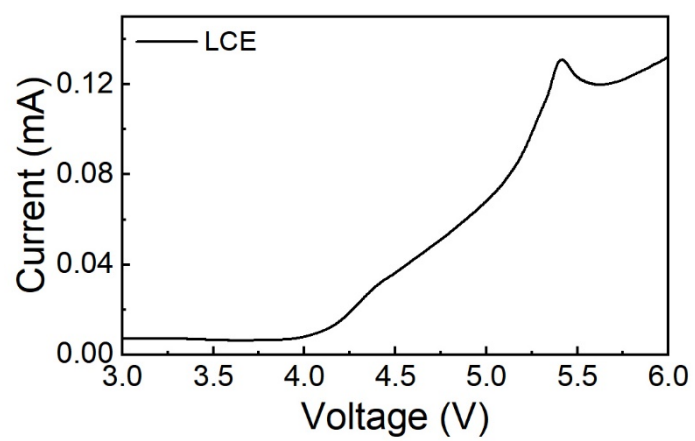

**Figure S4.** Linear sweep voltammetry of LCE.

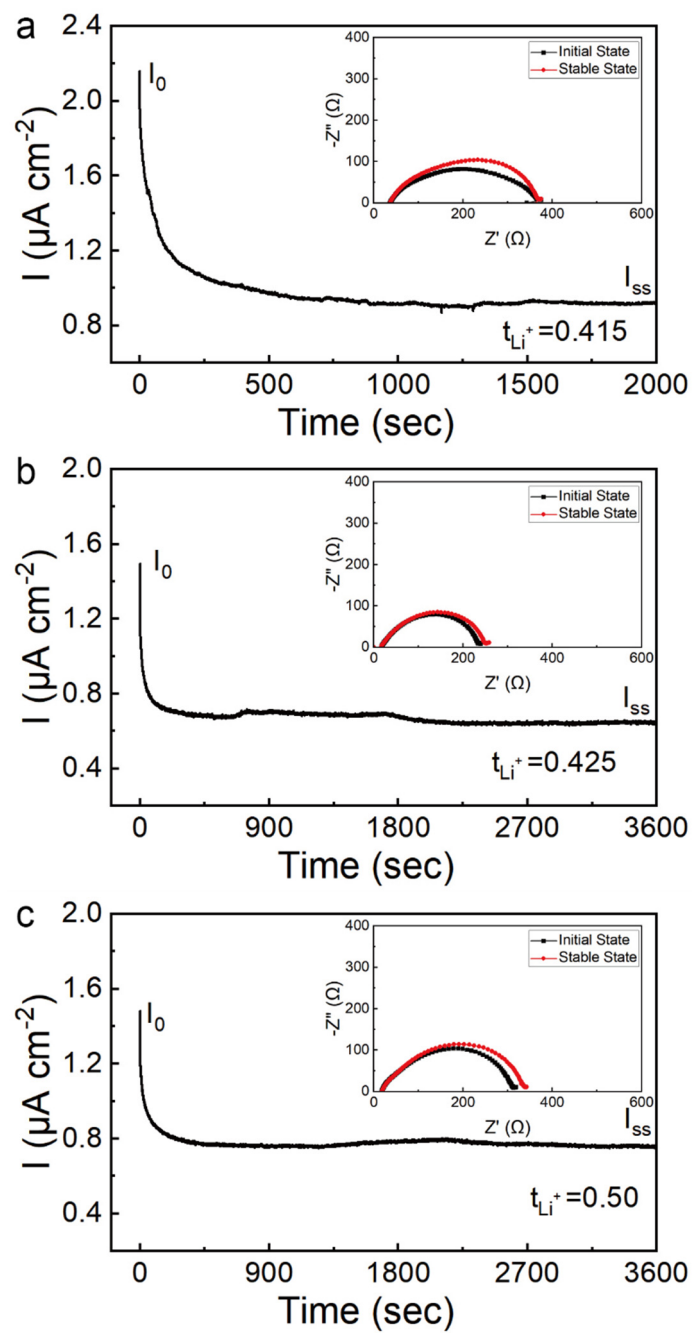

**Figure S5** Chronoamperometry of (a) Li/PE-40%LCE@PEG/Li, (b) Li/PE-50%LCE@PEG/Li, (c) Li/PE-60%LCE@PEG/Li symmetric cells at ambient temperature. The insets are the alternate current impedance spectra before and after polarization.

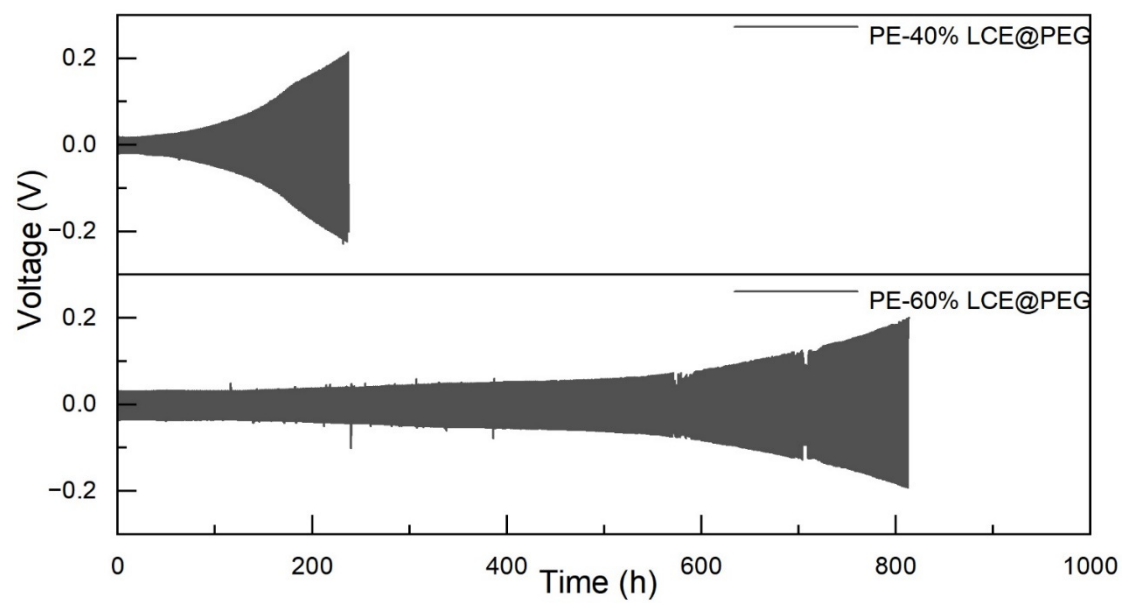

**Figure S6.** Long-term cycling of symmetrical Li cells using the PE-40%LCE@PEG and PE-60%LCE@PEG electrolytes at  $0.1 \text{ mA cm}^{-2}$  and  $60 \text{ }^{\circ}\text{C}$ .

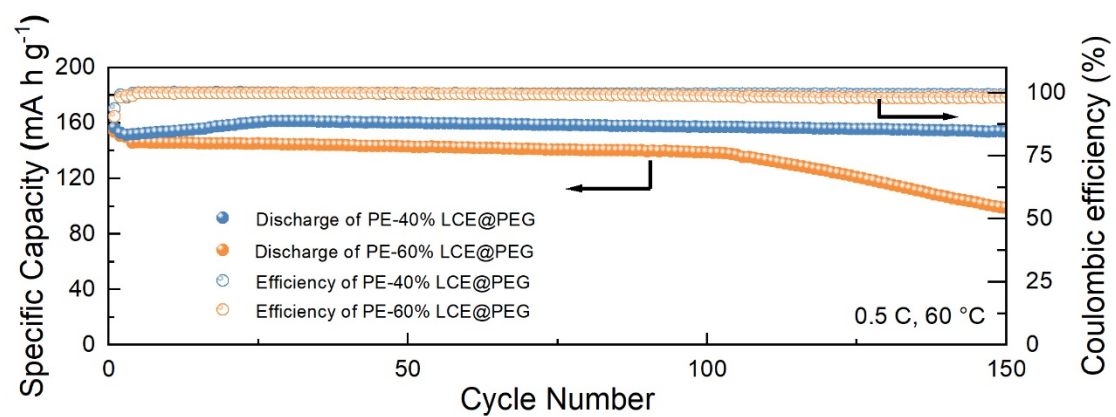

**Figure S7.** Cyclic performances of the LiFePO<sub>4</sub>/Li batteries assembled with PE-40%LCE@PEG and PE-60%LCE@PEG under 0.5 C rate and 60 °C.



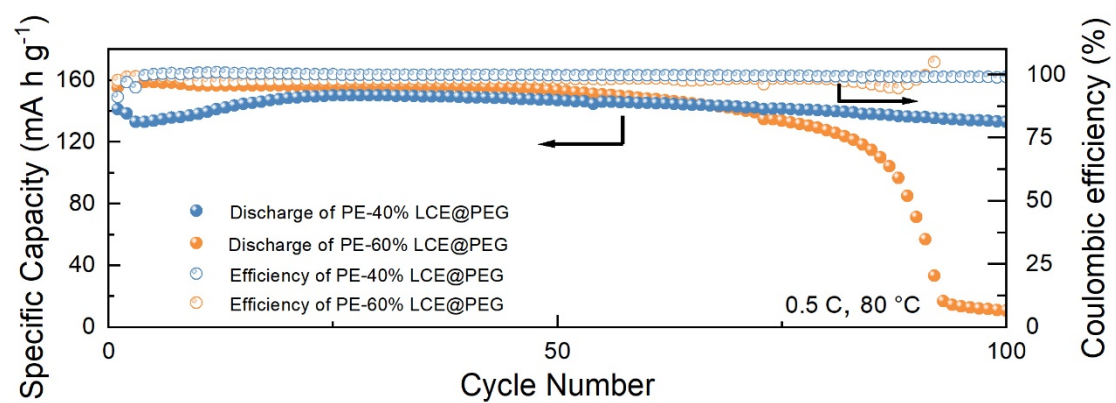

**Figure S8.** Cyclic performances of the  $\text{LiFePO}_4/\text{Li}$  batteries assembled with PE-40%LCE@PEG and PE-60%LCE@PEG under 0.5 C rate and 80 °C.

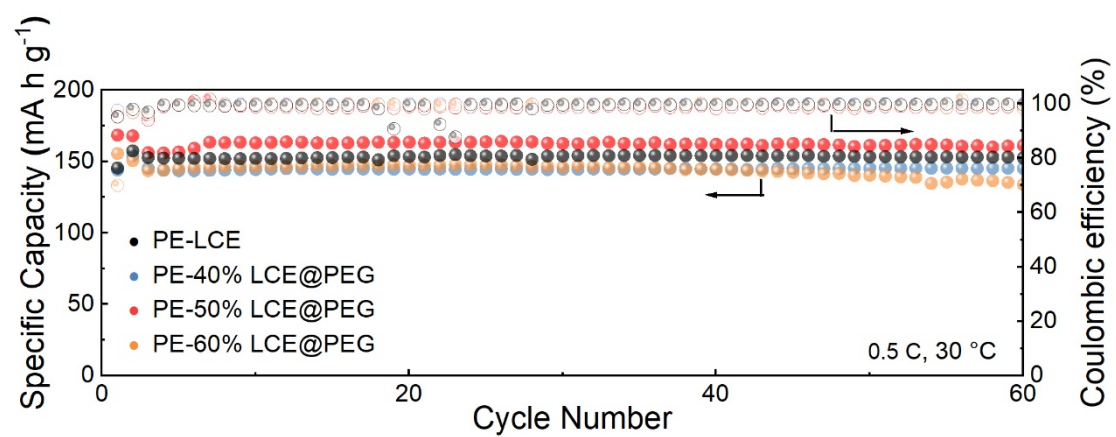

**Figure S9.** Cyclic performances of the  $\text{LiFePO}_4//\text{Li}$  battery with LCE and PE- $x\%$ LCE@PEG ( $x = 40, 50$ , and  $60$ ) electrolytes under  $0.5\text{ C}$  rate and  $30\text{ }^\circ\text{C}$ .

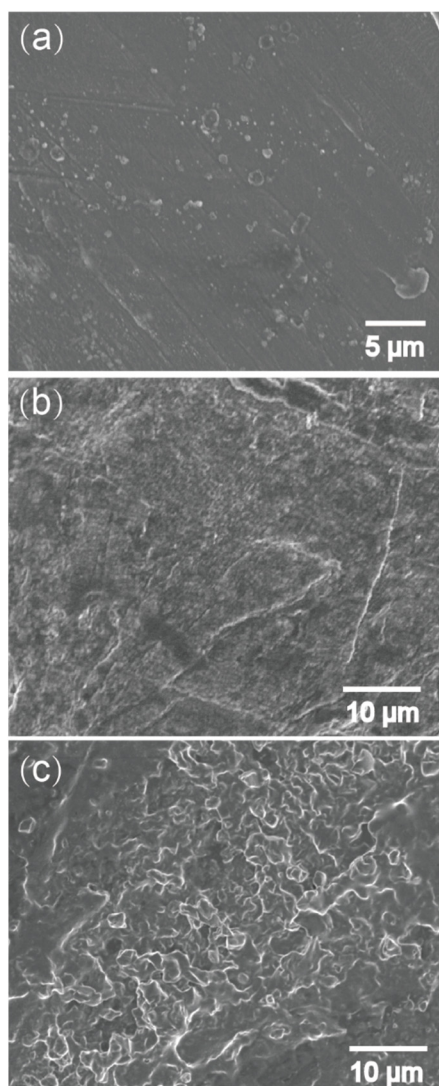

**Figure S10.** SEM images of the Li metal taken from (a) bare lithium, (b)  $\text{LiFePO}_4/\text{PE}-50\%\text{LCE@PEG}/\text{Li}$  cell after 100 cycles under 0.5C at 60 °C, (c)  $\text{LiFePO}_4/\text{LCE}/\text{Li}$  cell after 25 cycles under 0.5C at 60 °C.
